# Supplementary material
Source: publisher figshare collection journal article supplement (https://frontiersin.figshare.com/ndownloader/files/34057175)
Supplement: Supplementary file [file 34057175]

**Supplementary Table 1**

| Movement | Sh.Ab | ShAd | ElbE | ElbF | HipF | HipAd | HipE | KnE | KnF | ADf |
|----------|-------|------|------|------|------|-------|------|-----|-----|-----|
| 2011     | 4     | 4    | 3    | 5    | 4    | 5-    | 5    | 3   | 4   | 5-  |
| 2021     | 4     | 4    | 2    | 4    | 3    | 3+    | 4+   | 2   | 3+  | 4   |

**Supplementary Table 1. MRC scores for male proband.** MRC scores are provided for indicated movements in 2011 and 2021 for weak groups only, wrists fingers plantar flexion and toes were and remained normal. All scores were symmetrical. ShAb/Ad = shoulder abduction/adduction. Elb. E, F = elbow extension, flexion. Kn = knee, ADf = ankle dorsiflexion

**Supplementary Table 2**

| Muscle              | <u>Insertional</u> | <u>Spontaneous Activity</u> |        |      | <u>Volitional MUAPs</u> |           |      |        |             | <u>Max Volitional Activity</u> |         |        |
|---------------------|--------------------|-----------------------------|--------|------|-------------------------|-----------|------|--------|-------------|--------------------------------|---------|--------|
|                     | Insertional        | Fibs                        | + Wave | Fasc | Duration                | Amplitude | Poly | Config | Recruitment | Amplitude                      | Pattern | Effort |
| Tibialis anterior.L | Normal             | None                        | 2+     | 2+   | Normal                  | Sl. Incr. | 1+   | Normal | Normal      | Normal                         | Reduced | Max.   |
| Rectus femoris.L    | Normal             | 2+                          | None   | 2+   | Gr. Incr.               | Sl. Incr. | 2+   | Normal | Early       | Normal                         | Reduced | Max.   |
| Vastus lateralis.R  | CRD                | 2+                          | None   | 2+   | Gr. Incr.               | Sl. Incr. | 2+   | Normal | Early       | Normal                         | Reduced | Max.   |
| Deltoid.L           | CRD                | 2+                          | 1+     | 2+   | Gr. Incr.               | Sl. Incr. | 1+   | Normal | Early       | Normal                         | Reduced | Max.   |

**Supplementary Table 2. EMG scoring of sampled muscles for male proband.** CRD = complex repetitive discharges. Fibs = fibrillation potentials. +Wave = positive sharp waves.

Fasc=fasciculations. Poly = (excessively) polyphasic units. Sl / Gr Incr = slightly / greatly increased.

**Supplementary Table 3:** Multiple *in silico* analyses support the pathogenicity of the CAPN1 p.G492R and p.F610C variants.

| Method            | CAPN1 c.1474G>A (p.G492R) |                   | CAPN1 c.1829T>G (p.F610C) |                   |
|-------------------|---------------------------|-------------------|---------------------------|-------------------|
|                   | Score                     | Interpretation    | Score                     | Interpretation    |
| dbSNP153          | rs17883283                | Reported          | rs200876514               | Reported          |
| gnomAD Exomes     | 247/248,888               | Rare (0.0992%)    | 84/248,440                | Rare (0.0338%)    |
| GERP              | 5.26                      | Conserved         | 4.8699                    | Conserved         |
| PhastCons100way   | 1                         | Conserved         | 1                         | Conserved         |
| PhyloP100way      | 9.760                     | Conserved         | 7.669                     | Conserved         |
| PolyPhen          | 1                         | Probably Damaging | 1                         | Probably Damaging |
| PROVEAN           | -6.88                     | Deleterious       | -7.09                     | Deleterious       |
| SIFT              | 0.000                     | Damaging          | 0.000                     | Damaging          |
| Mutation Assessor | 4.01                      | High impact       | 4.25                      | High impact       |
| MutationTaster2   | 1                         | Disease Causing   | 1                         | Disease Causing   |
